# Supplementary material
Source: MDPI journal article supplement (https://www.mdpi.com/2227-7102/11/9/458)
Supplement: s1 [file s1 › education-1282477-SI.pdf]

**Table S1.** Questionnaire on the Awareness of SDGs of Senior High School Students (Adapted from Zamora-Polo et al (2019) [52]).

| Number                                                                            | Question                                                                                                                                 | Variable Type | Options                                                                                                                            |
|-----------------------------------------------------------------------------------|------------------------------------------------------------------------------------------------------------------------------------------|---------------|------------------------------------------------------------------------------------------------------------------------------------|
| <u>Demographic Questions</u>                                                      |                                                                                                                                          |               |                                                                                                                                    |
| Q1                                                                                | Age                                                                                                                                      | Quantitative  | 14,15,16,17,18,19                                                                                                                  |
| Q2                                                                                | Gender                                                                                                                                   | Categorical   | Male, Female                                                                                                                       |
| Q3                                                                                | Grade                                                                                                                                    | Quantitative  | 10,11,12                                                                                                                           |
| <u>Students' Self-Reported Knowledge of SDGs</u>                                  |                                                                                                                                          |               |                                                                                                                                    |
| Q4.1                                                                              | I know what the 17 SDGs are.                                                                                                             | Ordinal       | Likert Scale (1–5)<br>1: Not At All Informed<br>5: Very Well Informed                                                              |
| Q4.2                                                                              | I know the countries to which SDGs are addressed.                                                                                        |               |                                                                                                                                    |
| Q4.3                                                                              | I know the time horizon for which the SDGs are designed.                                                                                 |               |                                                                                                                                    |
| Q4.4                                                                              | I know the number of SDGs and could indicate one of the goals.                                                                           |               |                                                                                                                                    |
| <u>The Information Sources of Students' SDG knowledge</u>                         |                                                                                                                                          |               |                                                                                                                                    |
| Q4.5                                                                              | I have received information about the SDGs by email and/or Social Networks.                                                              | Ordinal       | Likert Scale (1–5)<br>1: Strongly Disagree<br>5: Strongly Agree                                                                    |
| Q4.6                                                                              | I have received information about the SDGs from the traditional media (press, radio and/or television).                                  |               |                                                                                                                                    |
| Q4.7                                                                              | I have received information about SDGs in formal education (kindergarten, primary school, junior high school, senior high school, etc.). |               |                                                                                                                                    |
| Q4.8                                                                              | I have received information about the SDGs in informal training (e.g., workshops of NGOs, extracurricular activities, etc.).             |               |                                                                                                                                    |
| <u>SDGs' Involvement in Courses and the Corresponding Subjects</u>                |                                                                                                                                          |               |                                                                                                                                    |
| Q5.1                                                                              | No Poverty                                                                                                                               | Ordinal       | Likert Scale (1–5)<br>1: Never Learned At All<br>5: Have Studied in Depth<br>* Fill in the specific subjects when choosing 4 or 5. |
| Q5.2                                                                              | Zero Hunger                                                                                                                              |               |                                                                                                                                    |
| Q5.3                                                                              | Good Health and Well-being                                                                                                               |               |                                                                                                                                    |
| Q5.4                                                                              | Quality Education                                                                                                                        |               |                                                                                                                                    |
| Q5.5                                                                              | Gender Equality                                                                                                                          |               |                                                                                                                                    |
| Q5.6                                                                              | Clean Water and Sanitation                                                                                                               |               |                                                                                                                                    |
| Q5.7                                                                              | Affordable and Clean Energy                                                                                                              |               |                                                                                                                                    |
| Q5.8                                                                              | Decent Work and Economic Growth                                                                                                          |               |                                                                                                                                    |
| Q5.9                                                                              | Industry, Innovation and Infrastructure                                                                                                  |               |                                                                                                                                    |
| Q5.10                                                                             | Reduced Inequalities                                                                                                                     |               |                                                                                                                                    |
| Q5.11                                                                             | Sustainable Cities and Communities                                                                                                       |               |                                                                                                                                    |
| Q5.12                                                                             | Responsible Consumption and Production                                                                                                   |               |                                                                                                                                    |
| Q5.13                                                                             | Climate Action                                                                                                                           |               |                                                                                                                                    |
| Q5.14                                                                             | Life below Water                                                                                                                         |               |                                                                                                                                    |
| Q5.15                                                                             | Life on Land                                                                                                                             |               |                                                                                                                                    |
| Q5.16                                                                             | Peace, Justice and Strong Institutions                                                                                                   |               |                                                                                                                                    |
| Q5.17                                                                             | Partnerships for the Goals                                                                                                               |               |                                                                                                                                    |
| <u>Course Subjects that support the realization of SDGs in Senior High School</u> |                                                                                                                                          |               |                                                                                                                                    |
| Q6.1                                                                              | Chinese and Native Culture                                                                                                               | Categorical   | Yes, No                                                                                                                            |
| Q6.2                                                                              | Math                                                                                                                                     |               |                                                                                                                                    |
| Q6.3                                                                              | Foreign Language                                                                                                                         |               |                                                                                                                                    |
| Q6.4                                                                              | Physics                                                                                                                                  |               |                                                                                                                                    |
| Q6.5                                                                              | Chemistry                                                                                                                                |               |                                                                                                                                    |
| Q6.6                                                                              | Biology                                                                                                                                  |               |                                                                                                                                    |
| Q6.7                                                                              | History                                                                                                                                  |               |                                                                                                                                    |
| Q6.8                                                                              | Geography                                                                                                                                |               |                                                                                                                                    |
| Q6.9                                                                              | Politics and Economics                                                                                                                   |               |                                                                                                                                    |
| Q6.10                                                                             | Computer Science                                                                                                                         |               |                                                                                                                                    |
| Q6.11                                                                             | Career and Psychology                                                                                                                    |               |                                                                                                                                    |
| Q6.12                                                                             | Physical Education                                                                                                                       |               |                                                                                                                                    |

**Table S1.** Questionnaire on the Awareness of SDGs of Senior High School Students (Adapted from Zamora-Polo et al (2019) [52]).

| Number                                           | Question                                | Variable Type | Options                |
|--------------------------------------------------|-----------------------------------------|---------------|------------------------|
| Q6.13                                            | Arts                                    |               |                        |
| Q6.14                                            | Technology and Laboratory Courses       |               |                        |
| <u>Impact of Personal Life on SDGs</u>           |                                         |               |                        |
| Q7.1                                             | No Poverty                              |               |                        |
| Q7.2                                             | Zero Hunger                             |               |                        |
| Q7.3                                             | Good Health and Well-being              |               |                        |
| Q7.4                                             | Quality Education                       |               |                        |
| Q7.5                                             | Gender Equality                         |               |                        |
| Q7.6                                             | Clean Water and Sanitation              |               |                        |
| Q7.7                                             | Affordable and Clean Energy             |               |                        |
| Q7.8                                             | Decent Work and Economic Growth         |               | Likert Scale (1–5)     |
| Q7.9                                             | Industry, Innovation and Infrastructure | Ordinal       | 1: No Impact At All    |
| Q7.10                                            | Reduced Inequalities                    |               | 5: Strong Impact       |
| Q7.11                                            | Sustainable Cities and Communities      |               |                        |
| Q7.12                                            | Responsible Consumption and Production  |               |                        |
| Q7.13                                            | Climate Action                          |               |                        |
| Q7.14                                            | Life below Water                        |               |                        |
| Q7.15                                            | Life on Land                            |               |                        |
| Q7.16                                            | Peace, Justice and Strong Institutions  |               |                        |
| Q7.17                                            | Partnerships for the Goals              |               |                        |
| <u>Students' Priorities of SDGs</u>              |                                         |               |                        |
| Q8.1                                             | No Poverty                              |               |                        |
| Q8.2                                             | Zero Hunger                             |               |                        |
| Q8.3                                             | Good Health and Well-being              |               |                        |
| Q8.4                                             | Quality Education                       |               |                        |
| Q8.5                                             | Gender Equality                         |               |                        |
| Q8.6                                             | Clean Water and Sanitation              |               |                        |
| Q8.7                                             | Affordable and Clean Energy             |               |                        |
| Q8.8                                             | Decent Work and Economic Growth         |               |                        |
| Q8.9                                             | Industry, Innovation and Infrastructure | Categorical   | Yes, No                |
| Q8.10                                            | Reduced Inequalities                    |               |                        |
| Q8.11                                            | Sustainable Cities and Communities      |               |                        |
| Q8.12                                            | Responsible Consumption and Production  |               |                        |
| Q8.13                                            | Climate Action                          |               |                        |
| Q8.14                                            | Life below Water                        |               |                        |
| Q8.15                                            | Life on Land                            |               |                        |
| Q8.16                                            | Peace, Justice and Strong Institutions  |               |                        |
| Q8.17                                            | Partnerships for the Goals              |               |                        |
| <u>Students' Career Planning related to SDGs</u> |                                         |               |                        |
| Q9.1                                             | No Poverty                              |               |                        |
| Q9.2                                             | Zero Hunger                             |               |                        |
| Q9.3                                             | Good Health and Well-being              |               |                        |
| Q9.4                                             | Quality Education                       |               |                        |
| Q9.5                                             | Gender Equality                         | Ordinal       | Likert Scale (1–5)     |
| Q9.6                                             | Clean Water and Sanitation              |               | 1: Absolute Impossible |
| Q9.7                                             | Affordable and Clean Energy             |               | 5: Highly Possible     |
| Q9.8                                             | Decent Work and Economic Growth         |               |                        |
| Q9.9                                             | Industry, Innovation and Infrastructure |               |                        |
| Q9.10                                            | Reduced Inequalities                    |               |                        |

**Table S1.** Questionnaire on the Awareness of SDGs of Senior High School Students (Adapted from Zamora-Polo et al (2019) [52]).

| Number | Question                               | Variable Type | Options |
|--------|----------------------------------------|---------------|---------|
| Q9.11  | Sustainable Cities and Communities     |               |         |
| Q9.12  | Responsible Consumption and Production |               |         |
| Q9.13  | Climate Action                         |               |         |
| Q9.14  | Life below Water                       |               |         |
| Q9.15  | Life on Land                           |               |         |
| Q9.16  | Peace, Justice and Strong Institutions |               |         |
| Q9.17  | Partnerships for the Goals             |               |         |
